# Supplementary material for: Leucine alleviates cytokine storm syndrome by regulating macrophage polarization via the mTORC1/LXRα signaling pathway
Source: eLife journal article supplement (doi:10.7554/elife.89750), 2023-08-31
Supplement: fig1-data3 [file Serum TNF-a.xlsx]

## Sheet: Sheet1
											Measured OD value	Corrected OD value	Concentration after 5-fold dilution	Concentration
										CON1	0.0686	0.0203	7.442	37.21	37.21
Concentration	Corrected OD value	OD value								CON2	0.0677	0.0194	6.8791	34.3955	34.3955
500	1.5793	1.6276								CON3	0.0679	0.0196	7.0043	35.0215	35.0215
250	0.6619	0.7102								CON4	0.1273	0.079	41.0933	205.466	205.466
125	0.2491	0.2974								CON5	0.0524	0.0041	-2.9627	-14.8135	0
62.5	0.1479	0.1962								CON6	0.0683	0.02	7.2545	36.2725	36.2725
31.25	0.0531	0.1014								LPS1	0.1347	0.0864	44.9798	224.899	224.899
15.625	0.0432	0.0915								LPS2	0.1743	0.126	64.7348	323.674	323.674
7.8	0.0164	0.0647								LPS3	0.1618	0.1135	58.6751	293.375	293.375
0	0	0.0483								LPS4	0.1652	0.1169	60.3384	301.692	301.692
										LPS5	0.1958	0.1475	74.8217	374.109	374.109
										LPS6	0.2479	0.1996	97.754	488.77	488.77
Block	0.0483									LPS7	0.1173	0.069	35.7304	178.652	178.652
										LPS+2%Leu1	0.0707	0.0224	8.7489	43.7445	43.7445
										LPS+2%Leu2	0.0695	0.0212	8.0032	40.016	40.016
										LPS+2%Leu3	0.0774	0.0291	12.8598	64.299	64.299
										LPS+2%Leu4	0.0607	0.0124	2.4419	12.2095	12.2095
										LPS+2%Leu5	0.1071	0.0588	30.1198	150.599	150.599
					y = a + b*x + c*x^2					LPS+2%Leu6	0.0589	0.0106	1.2834	6.417	6.417
					a = 0.00862					LPS+2%Leu7	0.0986	0.0503	25.3277	126.638	126.638
					b = 0.00154					LPS+2%Leu8	0.0555	0.0072	-0.9251	-4.6255	0
					c = 0.00000					LPS+5%Leu1	0.0638	0.0155	4.42	22.1	22.1
					r^2 = 0.99610					LPS+5%Leu2	0.0559	0.0076	-0.6639	-3.3195	0
										LPS+5%Leu3	0.0601	0.0118	2.0566	10.283	10.283
										LPS+5%Leu4	0.0946	0.0463	23.0337	115.168	115.168
										LPS+5%Leu5	0.115	0.0667	34.478	172.39	172.39
										LPS+5%Leu6	0.055	0.0067	-1.2522	-6.261	0
										LPS+5%Leu7	0.1112	0.0629	32.3928	161.964	161.964
										LPS+5%Leu8	0.0602	0.0119	2.1208	10.604	10.604
										LPS+2%+5%Leu1	0.0586	0.0103	1.089	5.445	5.445
										LPS+2%+5%Leu2	0.0686	0.0203	7.442	37.21	37.21
										LPS+2%+5%Leu3	0.0841	0.0358	16.8851	84.4255	84.4255
										LPS+2%+5%Leu4	0.1201	0.0718	37.2453	186.226	186.226
										LPS+2%+5%Leu5	0.0916	0.0433	21.296	106.48	106.48
										LPS+2%+5%Leu6	0.0947	0.0464	23.0913	115.457	115.457
										LPS+2%+5%Leu7	0.0694	0.0211	7.9409	39.7045	39.7045
										LPS+2%+5%Leu8	0.0782	0.0299	13.3448	66.724	66.724
