# Supplementary material for: Leucine alleviates cytokine storm syndrome by regulating macrophage polarization via the mTORC1/LXRα signaling pathway
Source: eLife journal article supplement (doi:10.7554/elife.89750), 2023-08-31
Supplement: fig1-data4 [file Liver IFN-.xlsx]

## Sheet: Sheet1
												Measured OD value	Corrected OD value	Concentration after 70-fold dilution	Concentration	Concentration of supernatant protein	Relative content
Concentration	Corrected OD value	OD value									Control1	0.1675	0.0865	15.6328	1094.3	11.1518	98.1273
500	1.4634	1.5444									Control2	0.1936	0.1126	21.5878	1511.15	10.3997	145.307
250	0.9544	1.0354									Control3	0.1341	0.0531	8.0828	565.796	10.1792	55.5837
125	0.5149	0.5959									Control4	0.1578	0.0768	13.4321	940.247	10.0866	93.2171
62.5	0.3028	0.3838									Control5	0.1439	0.0629	10.29	720.3	10.3761	69.4194
31.25	0.1599	0.2409									Control6	0.126	0.045	6.2634	438.438	9.43296	46.4794
15.625	0.0929	0.1739									Control7	0.1438	0.0628	10.2674	718.718	9.47037	75.8912
7.8	0.0539	0.1349									Control8	0.1547	0.0737	12.7301	891.107	10.1811	87.5253
0	0	0.081									LPS1	0.2312	0.1502	30.2544	2117.81	11.201	189.073
											LPS2	0.2747	0.1937	40.4145	2829.01	9.93306	284.808
											LPS3	0.1613	0.0803	14.2254	995.778	10.9352	91.0615
Block	0.081										LPS4	0.214	0.133	26.2769	1839.38	10.7718	170.759
											LPS5	0.1647	0.0837	14.9969	1049.78	10.7876	97.3143
											LPS6	0.1729	0.0919	16.8609	1180.26	10.2835	114.772
											LPS7	0.1886	0.1076	20.4433	1431.03	11.5672	123.714
											LPS8	0.1623	0.0813	14.4522	1011.65	12.7643	79.2564
											LPS+2%Leu1	0.1486	0.0676	11.3509	794.563	9.59441	82.8152
											LPS+2%Leu2	0.1759	0.0949	17.544	1228.08	8.86789	138.486
						y = a + b*x + c*x^2					LPS+2%Leu3	0.1386	0.0576	9.0954	636.678	9.93109	64.1096
						a = 0.01696					LPS+2%Leu4	0.1746	0.0936	17.248	1207.36	9.71057	124.335
						b = 0.00450					LPS+2%Leu5	0.1311	0.0501	7.4084	518.588	9.11203	56.9125
						c = -0.00000					LPS+2%Leu6	0.1343	0.0533	8.1277	568.939	10.9589	51.9159
						r^2 = 0.99865					LPS+2%Leu7	0.1314	0.0504	7.4758	523.306	10.9077	47.976
											LPS+2%Leu8	0.1241	0.0431	5.8373	408.611	10.8703	37.5898
											LPS+5%Leu1	0.1474	0.0664	11.0799	775.593	10.5434	73.5618
											LPS+5%Leu2	0.1655	0.0845	15.1785	1062.49	10.4115	102.05
											LPS+5%Leu3	0.1784	0.0974	18.1138	1267.97	10.6753	118.775
											LPS+5%Leu4	0.1838	0.1028	19.3461	1354.23	13.0853	103.493
											LPS+5%Leu5	0.1675	0.0865	15.6328	1094.3	14.4969	75.4846
											LPS+5%Leu6	0.1299	0.0489	7.1388	499.716	12.1047	41.2827
											LPS+5%Leu7	0.1218	0.0408	5.3218	372.526	9.50581	39.1893
											LPS+5%Leu8	0.1248	0.0438	5.9943	419.601	13.6385	30.7659
											LPS+2%+5%Leu1	0.1418	0.0608	9.8164	687.148	12.4788	55.0651
											LPS+2%+5%Leu2	0.1562	0.0752	13.0697	914.879	7.35972	124.309
											LPS+2%+5%Leu3	0.1378	0.0568	8.9153	624.071	9.05493	68.9206
											LPS+2%+5%Leu4	0.1482	0.0672	11.2605	788.235	14.2981	55.1287
											LPS+2%+5%Leu5	0.1336	0.0526	7.9703	557.921	9.05296	61.6286
											LPS+2%+5%Leu6	0.1396	0.0586	9.3207	652.449	10.4253	62.5834
											LPS+2%+5%Leu7	0.122	0.041	5.3667	375.669	8.87379	42.3347
											LPS+2%+5%Leu8	0.1295	0.0485	7.0491	493.437	8.70053	56.7134
