# Supplementary material for: Leucine alleviates cytokine storm syndrome by regulating macrophage polarization via the mTORC1/LXRα signaling pathway
Source: eLife journal article supplement (doi:10.7554/elife.89750), 2023-08-31
Supplement: fig1-data5 [file Liver qPCR Results.xlsx]

## Sheet: Sheet2
																15.7574	11.8678	13.3585	18.2808	12.7903
CT	cyclophilin	IL-6	IL-1p	MCP1	Inos	NLRP3			IL-6	IL-1p	MCP1	Inos	NLRP3			IL-6	IL-1p	MCP1	Inos	NLRP3			IL-6	IL-1p	MCP1	Inos	NLRP3
Control-1	16.7146	32.3778	29.8049	30.3362	33.212	29.1122		Control-1	15.6632	13.0903	13.6216	16.4974	12.3976		Control-1	-0.0941908	1.22252	0.263144	-1.7834	-0.392634		Control-1	1.06747	0.428533	0.83327	3.44237	1.31279
Control-2	16.7468	32.8929	29.9981	30.0117	33.212	30.3848		Control-2	16.146	13.2513	13.2649	16.4652	13.638		Control-2	0.388652	1.38351	-0.0935724	-1.8156	0.847705		Control-2	0.763843	0.383284	1.06701	3.52006	0.555668
Control-3	16.7042	32.2871	29.7934	29.916	37.3288	29.8745		Control-3	15.5829	13.0892	13.2118	20.6246	13.1703		Control-3	-0.174462	1.22139	-0.14667	2.34381	0.380044		Control-3	1.12854	0.42887	1.10701	0.19699	0.768414
Control-4	16.9941	33.0134	28.9781	30.0431	37.3288	30.1158		Control-4	16.0193	11.984	13.049	20.3347	13.1217		Control-4	0.261948	0.116192	-0.30951	2.05391	0.331469		Control-4	0.833961	0.92262	1.23929	0.24083	0.794727
Control-5	17.1793	34.5346	29.1954	31.1933	35.002	30.4296		Control-5	17.3553	12.0161	14.014	17.8227	13.2503		Control-5	1.59785	0.148309	0.655526	-0.458124	0.460054		Control-5	0.330368	0.902307	0.634844	1.37375	0.726959
Control-6	17.0244	32.1254	28.3133	30.2968	35.1293	29.5103		Control-6	15.1009	11.2889	13.2724	18.1049	12.4859		Control-6	-0.656455	-0.578874	-0.0861099	-0.175883	-0.304358		Control-6	1.57621	1.49368	1.0615	1.12966	1.23487
Control-7	16.6661	32.8763	27.5715	30.1178	35.1293	29.187		Control-7	16.2102	10.9054	13.4517	18.4633	12.5209		Control-7	0.452839	-0.962403	0.09324	0.182477	-0.269332		Control-7	0.730604	1.94855	0.937415	0.881189	1.20525
Control-8	17.0625	31.0437	26.3797	30.045	34.9962	28.7999		Control-8	13.9812	9.31716	12.9825	17.9336	11.7373		Control-8	-1.77618	-2.55064	-0.376048	-0.347189	-1.05295		Control-8	3.42519	5.85896	1.29778	1.27208	2.07476
LPS-1	16.8676	27.6201	25.6471	23.3138	27.5558	27.3677		LPS-1	10.7525	8.77952	6.44626	10.6883	10.5002		LPS-1	-5.0049	-3.08829	-6.91223	-7.59254	-2.2901		LPS-1	32.1088	8.50487	120.445	193.011	4.89091
LPS-2	16.9498	30.1465	26.9663	25.9229	29.5823	28.0346		LPS-2	13.1967	10.0165	8.97307	12.6325	11.0849		LPS-2	-2.56066	-1.8513	-4.38542	-5.64827	-1.70542		LPS-2	5.89978	3.60825	20.8999	50.1533	3.26123
LPS-3	18.0323	30.2677	26.985	25.876	29.8229	28.2492		LPS-3	12.2354	8.95269	7.84361	11.7906	10.2168		LPS-3	-3.52203	-2.91512	-5.51488	-6.49022	-2.57343		LPS-3	11.4878	7.54288	45.7241	89.8982	5.95222
LPS-4	17.4875	29.0661	25.9545	23.0205	27.2694	27.5402		LPS-4	11.5786	8.46704	5.53306	9.78194	10.0527		LPS-4	-4.17881	-3.40077	-7.82544	-8.49888	-2.73753		LPS-4	18.1112	10.5617	226.826	361.758	6.66929
LPS-5	17.3381	29.198	26.7274	24.1487	28.2883	28.3517		LPS-5	11.8599	9.38931	6.8106	10.9502	11.0137		LPS-5	-3.89745	-2.4785	-6.5479	-7.33062	-1.77661		LPS-5	14.9022	5.57318	93.5652	160.967	3.4262
LPS-6	17.8127	29.4239	26.655	25.2078	30.8893	28.4168		LPS-6	11.6113	8.84237	7.39511	13.0766	10.6041		LPS-6	-4.14613	-3.02544	-5.96339	-5.20418	-2.18613		LPS-6	17.7056	8.1423	62.3964	36.8651	4.55082
LPS-7	17.4983	28.9392	26.1165	24.1456	27.7132	26.9123		LPS-7	11.4409	8.61823	6.64739	10.215	9.41405		LPS-7	-4.31646	-3.24957	-6.71111	-8.06586	-3.37622		LPS-7	19.9244	9.51084	104.772	267.957	10.3835
LPS-8	17.1846	28.6062	26.3859	24.5665	28.4421	27.9211		LPS-8	11.4216	9.20123	7.3819	11.2574	10.7365		LPS-8	-4.33581	-2.66657	-5.97659	-7.02339	-2.05378		LPS-8	20.1934	6.34919	62.9701	130.092	4.15192
LPS+2%Leu-1	16.7873	29.2407	26.8994	25.4733	29.5004	27.95		LPS+2%Leu-1	12.4533	10.1121	8.68602	12.713	11.1626		LPS+2%Leu-1	-3.30407	-1.75569	-4.67248	-5.56778	-1.62764		LPS+2%Leu-1	9.87697	3.37688	25.501	47.4317	3.09007
LPS+2%Leu-2	17.4172	29.9787	26.7767	26.212	29.6497	27.6936		LPS+2%Leu-2	12.5614	9.35942	8.7948	12.2324	10.2764		LPS+2%Leu-2	-3.19597	-2.50838	-4.56369	-6.04838	-2.51389		LPS+2%Leu-2	9.16393	5.68981	23.6488	66.1824	5.7116
LPS+2%Leu-3	17.188	30.2444	26.9223	26.2508	29.128	27.6461		LPS+2%Leu-3	13.0565	9.73438	9.0628	11.94	10.4581		LPS+2%Leu-3	-2.70093	-2.13342	-4.2957	-6.34078	-2.33213		LPS+2%Leu-3	6.5022	4.38757	19.6397	81.052	5.03549
LPS+2%Leu-4	16.4023	27.2357	24.472	24.1287	30.3705	26.3565		LPS+2%Leu-4	10.8334	8.06971	7.72637	13.9682	9.95418		LPS+2%Leu-4	-4.924	-3.79809	-5.63212	-4.31265	-2.83609		LPS+2%Leu-4	30.3579	13.9104	49.595	19.8718	7.14083
LPS+2%Leu-5	17.0723	28.6731	25.5474	24.9933	30.1999	27.4126		LPS+2%Leu-5	11.6008	8.47508	7.92103	13.1276	10.3403		LPS+2%Leu-5	-4.15657	-3.39272	-5.43747	-5.15322	-2.45001		LPS+2%Leu-5	17.8341	10.5029	43.3353	35.5856	5.46419
LPS+2%Leu-6	17.7875	29.7692	26.7561	24.1783	28.1809	27.9621		LPS+2%Leu-6	11.9817	8.96868	6.39087	10.3935	10.1746		LPS+2%Leu-6	-3.7757	-2.89912	-6.96762	-7.88737	-2.61564		LPS+2%Leu-6	13.6962	7.45973	125.16	236.774	6.12897
LPS+2%Leu-7	17.8106	30.7171	27.0066	25.4962	31.0133	28.2757		LPS+2%Leu-7	12.9064	9.19597	7.6856	13.2027	10.4651		LPS+2%Leu-7	-2.85097	-2.67183	-5.6729	-5.07812	-2.3252		LPS+2%Leu-7	7.21487	6.37239	51.0168	33.7805	5.01135
LPS+2%Leu-8	17.8128	30.0948	26.3314	25.2706	31.9129	27.8938		LPS+2%Leu-8	12.282	8.5186	7.45784	14.1001	10.0811		LPS+2%Leu-8	-3.47538	-3.34921	-5.90066	-4.18073	-2.70922		LPS+2%Leu-8	11.1223	10.1909	59.7415	18.1353	6.53967
LPS+5%Leu-1	17.0109	30.4219	27.6136	26.8071	31.2245	29.2883		LPS+5%Leu-1	13.4111	10.6027	9.79617	14.2136	12.2774		LPS+5%Leu-1	-2.34634	-1.26513	-3.56233	-4.06717	-0.512831		LPS+5%Leu-1	5.08533	2.40349	11.8132	16.7626	1.42685
LPS+5%Leu-2	17.3388	30.7471	27.6773	25.2227	31.8861	29.709		LPS+5%Leu-2	13.4083	10.3385	7.8839	14.5473	12.3702		LPS+5%Leu-2	-2.3491	-1.52933	-5.4746	-3.73348	-0.420072		LPS+5%Leu-2	5.09507	2.88651	44.4651	13.3011	1.33799
LPS+5%Leu-3	17.097	31.1473	27.763	25.1957	30.6377	29.4783		LPS+5%Leu-3	14.0502	10.6659	8.09869	13.5407	12.3813		LPS+5%Leu-3	-1.70718	-1.20189	-5.25981	-4.74017	-0.408974		LPS+5%Leu-3	3.26521	2.30041	38.3142	26.7259	1.32774
LPS+5%Leu-4	18.2372	28.8029	27.5243	26.7714	31.4104	28.5766		LPS+5%Leu-4	10.5657	9.28709	8.5342	13.1732	10.3394		LPS+5%Leu-4	-5.1917	-2.58072	-4.8243	-5.1076	-2.45091		LPS+5%Leu-4	36.5475	5.98237	28.3308	34.4778	5.4676
LPS+5%Leu-5	15.9116	28.3692	26.308	23.4047	31.5585	29.2013		LPS+5%Leu-5	12.4576	10.3964	7.49307	15.6469	13.2897		LPS+5%Leu-5	-3.29985	-1.47141	-5.86543	-2.63389	0.499441		LPS+5%Leu-5	9.84811	2.77293	58.3002	6.20697	0.707381
LPS+5%Leu-6	17.245	29.8508	26.6204	25.7668	30.8383	28.1502		LPS+5%Leu-6	12.6058	9.37546	8.52187	13.5933	10.9053		LPS+5%Leu-6	-3.15158	-2.49235	-4.83663	-4.68753	-1.88499		LPS+5%Leu-6	8.88629	5.62693	28.574	25.7683	3.69349
LPS+5%Leu-7	17.333	30.3044	26.6838	25.1427	30.9914	28.5238		LPS+5%Leu-7	12.9714	9.35083	7.80979	13.6585	11.1909		LPS+5%Leu-7	-2.78596	-2.51698	-5.54871	-4.62235	-1.5994		LPS+5%Leu-7	6.89697	5.72382	46.8089	24.63	3.03017
LPS+5%Leu-8	18.4304	30.9475	27.4046	24.5586	37.7537	29.4033		LPS+5%Leu-8	12.5172	8.97422	6.12824	19.3233	10.9729		LPS+5%Leu-8	-3.24023	-2.89359	-7.23026	1.04248	-1.81736		LPS+5%Leu-8	9.44942	7.43117	150.15	0.485491	3.52436
LPS+2%+5%Leu-1	17.4194	29.231	26.6133	24.5727	31.206	28.5814		LPS+2%+5%Leu-1	11.8117	9.19391	7.15335	13.7866	11.1621		LPS+2%+5%Leu-1	-3.94574	-2.6739	-6.20514	-4.4942	-1.62819		LPS+2%+5%Leu-1	15.4095	6.38152	73.7793	22.5366	3.09125
LPS+2%+5%Leu-2	17.4836	30.6027	26.9946	26.2865	31.0014	28.6762		LPS+2%+5%Leu-2	13.1192	9.51101	8.80291	13.5178	11.1926		LPS+2%+5%Leu-2	-2.6382	-2.35679	-4.55559	-4.76301	-1.59763		LPS+2%+5%Leu-2	6.22555	5.12231	23.5164	27.1524	3.02646
LPS+2%+5%Leu-3	17.1047	30.7509	27.0146	26.3588	31.2635	28.7895		LPS+2%+5%Leu-3	13.6462	9.90993	9.25407	14.1588	11.6848		LPS+2%+5%Leu-3	-2.11122	-1.95788	-4.10443	-4.12204	-1.10549		LPS+2%+5%Leu-3	4.32055	3.88491	17.2011	17.4123	2.15171
LPS+2%+5%Leu-4	16.9845	28.6198	25.993	23.8247	31.8506	27.9613		LPS+2%+5%Leu-4	11.6353	9.00852	6.84027	14.8662	10.9768		LPS+2%+5%Leu-4	-4.12212	-2.85929	-6.51823	-3.41465	-1.81344		LPS+2%+5%Leu-4	17.4133	7.25657	91.6605	10.6638	3.51481
LPS+2%+5%Leu-5	17.3064	30.3232	27.0369	25.7096	31.2899	28.6112		LPS+2%+5%Leu-5	13.0168	9.73052	8.40324	13.9836	11.3048		LPS+2%+5%Leu-5	-2.74059	-2.13729	-4.95526	-4.29725	-1.48545		LPS+2%+5%Leu-5	6.68342	4.39934	31.0228	19.6608	2.80004
LPS+2%+5%Leu-6	18.1907	30.8038	28.0893	27.0937	31.6364	29.2748		LPS+2%+5%Leu-6	12.6131	9.89858	8.90299	13.4457	11.0841		LPS+2%+5%Leu-6	-3.14433	-1.96923	-4.45551	-4.83512	-1.70619		LPS+2%+5%Leu-6	8.84176	3.91559	21.9403	28.544	3.26299
LPS+2%+5%Leu-7	17.6104	30.783	30.0018	26.2377	36.7822	32.3464		LPS+2%+5%Leu-7	13.1727	12.3914	8.62735	19.1719	14.736		LPS+2%+5%Leu-7	-2.58473	0.523607	-4.73115	0.891054	1.94577		LPS+2%+5%Leu-7	5.99905	0.695631	26.5594	0.53922	0.259576
LPS+2%+5%Leu-8	17.3644	30.5488	26.7138	25.8652	31.3807	28.3238		LPS+2%+5%Leu-8	13.1845	9.34939	8.50084	14.0163	10.9594		LPS+2%+5%Leu-8	-2.57294	-2.51841	-4.85766	-4.26453	-1.83087		LPS+2%+5%Leu-8	5.95022	5.72952	28.9935	19.2199	3.55752
