# Supplementary material for: Leucine alleviates cytokine storm syndrome by regulating macrophage polarization via the mTORC1/LXRα signaling pathway
Source: eLife journal article supplement (doi:10.7554/elife.89750), 2023-08-31
Supplement: fig2-data1 [file Routine blood.xlsx]

## Sheet: Sheet1
	Control1	Control2	Control3	Control4	Control5	Control6	Control7	Control8	LPS1	LPS2	LPS3	LPS4	LPS5	LPS6	LPS7	LPS8	LPS+2%W-Leu1	LPS+2%W-Leu2	LPS+2%W-Leu3	LPS+2%W-Leu4	LPS+2%W-Leu5	LPS+2%W-Leu6	LPS+2%W-Leu7	LPS+2%W-Leu8	LPS+5%F-Leu1	LPS+5%F-Leu2	LPS+5%F-Leu3	LPS+5%F-Leu4	LPS+5%F-Leu5	LPS+5%F-Leu6	LPS+5%F-Leu7	LPS+5%F-Leu8	LPS+2%W+5%F-Leu1	LPS+2%W+5%F-Leu2	LPS+2%W+5%F-Leu3	LPS+2%W+5%F-Leu4	LPS+2%W+5%F-Leu5	LPS+2%W+5%F-Leu6	LPS+2%W+5%F-Leu7	LPS+2%W+5%F-Leu8	Unit	Reference range
WBC	3.88	3.32	5.26	3.37	1.9	3.43	2.42	2.14	1.68	4.43	2.04	3.31	3.6	3.95	2.73	3.59	3.17	3.47	2.62	4.16	3.29	2.72	2.25	1.38	2.74	3.02	2.74	2.64	1.48	3.75	3.03	2.03	2.62	2.63	2.06	3.65	1.54	2.94	1.94	2.2	10^9/L	0.80-10.60
Neu#	0.31	0.42	0.38	0.27	0.2	0.46	0.23	0.23	0.75	1.75	0.96	1.38	1.43	1.83	1.3	1.64	1.11	1.59	1.1	1.32	1.43	0.83	0.93	0.57	1.01	1.35	1.31	1.25	0.82	1.75	1.28	0.54	1.13	0.97	0.79	1.86	0.58	1.15	0.75	0.97	10^9/L	0.23-3.60
Lym#	3.45	2.77	4.73	2.99	1.64	2.79	2.11	1.8	0.66	1.65	0.43	1.19	1.29	1.13	0.53	0.73	1.25	0.76	0.78	1.79	0.99	1.33	0.74	0.48	0.97	1.27	0.41	0.66	0.33	0.96	0.98	0.94	0.69	0.98	0.73	0.81	0.5	0.91	0.65	0.69	10^9/L	0.60-8.90
Mon#	0.08	0.11	0.12	0.09	0.05	0.14	0.06	0.09	0.04	0.68	0.42	0.46	0.48	0.71	0.48	0.83	0.42	0.72	0.55	0.59	0.58	0.32	0.42	0.23	0.61	0.19	0.63	0.45	0.23	0.83	0.56	0.35	0.57	0.46	0.4	0.76	0.17	0.55	0.4	0.33	10^9/L	0.04-1.40
Eos#	0.04	0.02	0.03	0.02	0.01	0.03	0.01	0.02	0.18	0.29	0.22	0.25	0.37	0.25	0.35	0.31	0.35	0.35	0.17	0.4	0.24	0.22	0.15	0.09	0.14	0.18	0.35	0.27	0.09	0.19	0.19	0.19	0.22	0.21	0.14	0.21	0.27	0.3	0.13	0.18	10^9/L	0.00-0.51
Bas#	0	0	0	0	0	0.01	0.01	0	0.05	0.06	0.01	0.03	0.03	0.03	0.07	0.08	0.04	0.05	0.02	0.06	0.05	0.02	0.01	0.01	0.01	0.03	0.04	0.01	0.01	0.02	0.02	0.01	0.01	0.01	0	0.01	0.02	0.03	0.01	0.03	10^9/L	0.00-0.12
Neu%	8	12.4	7.2	7.9	10.7	13.2	9.2	10.5	44.2	39.4	46.6	41.5	39.7	46.2	47.5	45.6	35	45.7	41.8	31.6	43.4	30.5	41.1	40.7	36.7	44.5	47.8	47.2	55.2	46.5	42.1	26.5	42.9	36.6	38.1	50.9	37.2	38.8	38.4	44	%	6.5-50.0
Lym%	88.9	83.4	89.9	88.8	86	81.2	87.2	84.1	38.8	37.3	20.9	36	35.8	28.4	19.5	20.2	39.3	21.7	29.9	43.1	29.9	48.7	32.6	34.4	35.3	41.9	14.6	24.7	22.3	25.6	32.1	46.2	26.2	37	35.1	22.1	32.5	30.7	33.1	31.2	%	40.0-92.0
Mon%	2	3.3	2.2	2.5	2.6	4.2	2.6	4.4	2.8	15.3	20.6	13.9	13.2	18.2	17.6	23.1	13.2	21	21	14.1	17.8	11.9	18.8	16.7	22.2	6.4	22.9	17.3	14.9	22.4	18.6	16.9	21.9	17.7	19.4	20.8	11.1	19	20.6	15	%	0.9-18.0
Eos%	0.9	0.8	0.6	0.7	0.7	1.1	0.6	1	11.2	6.5	11	7.7	10.2	6.4	12.9	8.7	11.2	10.1	6.5	9.7	7.4	8.1	7	7.2	5.3	6	13.1	10.2	6.5	5	6.5	9.5	8.4	8.2	7.2	5.7	17.9	10.4	7.1	8.5	%	0.0-7.5
Bas%	0.2	0.1	0.1	0.1	0	0.3	0.4	0	3	1.5	0.9	0.9	1.1	0.8	2.5	2.4	1.3	1.5	0.8	1.5	1.5	0.8	0.5	1	0.5	1.2	1.6	0.6	1.1	0.5	0.7	0.9	0.6	0.5	0.2	0.5	1.3	1.1	0.8	1.3	%	0.0-1.5
RBC	11.1	10.94	11.2	11.48	10.99	11.41	11.47	11.25	10.54	10.37	10.24	10.82	10.73	10.09	10.4	10.54	10.49	10.94	9.92	10.19	9.12	11.04	9.9	10.45	10.54	11.54	10.07	10.59	10.47	9.94	10.35	11.15	10.64	11.18	10.22	11.3	9.32	9.52	9.24	11.03	10^12/L	6.50-11.50
HGB	179	171	173	176	174	177	***	***	167	164	157	167	169	155	158	163	164	168	154	163	145	174	156	160	164	177	159	165	164	155	160	173	164	171	159	175	148	148	145	173	g/L	110-165
HCT	49.9	47.8	48.7	49.2	47.4	48.7	49.6	49.1	49.3	50.2	47.9	49	50.2	46.2	47.6	47.9	48.2	50.4	45.7	46.8	43	49.9	46.3	47.9	48.2	50.5	45.6	48.5	48.2	45.1	46.4	49.3	48.5	49.3	46.7	50.1	42.6	43	42.3	50.7	%	35.0-55.0
MCV	44.9	43.7	43.5	42.9	43.1	42.7	43.2	43.7	46.8	48.4	46.7	45.3	46.8	45.8	45.8	45.4	45.9	46.1	46.1	46	47.2	45.2	46.8	45.9	45.7	43.7	45.3	45.8	46.1	45.4	44.8	44.2	45.6	44.1	45.7	44.4	45.8	45.1	45.7	46	fL	41.0-55.0
MCH	16.1	15.6	15.5	15.4	15.8	15.5	***.*	***.*	15.8	15.8	15.3	15.5	15.8	15.4	15.1	15.4	15.7	15.3	15.5	16	15.9	15.8	15.7	15.3	15.6	15.3	15.8	15.6	15.7	15.6	15.5	15.6	15.4	15.3	15.6	15.5	15.9	15.5	15.7	15.7	pg	13.0-18.0
MCHC	359	357	356	359	366	364	****	****	338	327	328	342	337	336	331	340	341	332	337	349	338	350	336	334	341	350	349	340	340	344	345	352	338	347	341	349	348	344	343	341	g/L	300-360
RDW-CV	15	13.5	14.2	13.7	13.4	13.8	14.1	13.2	14.7	16.4	16.3	13.9	15.8	15.9	15	15.2	15.1	14.9	14.8	14.2	15.4	14	17	17	15.6	14.8	15	16.4	16.3	16.6	14.2	14.9	15.7	15.6	15.5	15.7	16.3	15.1	15	16	%	12.0-19.0
RDW-SD	30.9	27.2	28.2	27	26.5	27	28	26.3	31.2	36	34.8	28.7	33.6	33.4	31.4	31.8	31.5	31.5	31.4	29.6	33.1	29	36.3	35.8	32.7	29.8	30.9	34.4	34.8	34.7	29.3	30.2	32.9	31.6	32.5	32.2	34	30.9	31.3	34	fL	23.0-39.0
PLT	263	148	240	179	388	274	377	225	158	427	281	345	376	406	599	573	219	512	256	232	82	131	91	124	136	129	149	297	205	567	184	93	163	283	119	122	102	61	75	108	10^9/L	400-1600
MPV	5.1	4.9	5	4.8	4.8	5	4.9	5.1	5.5	5.2	5.5	4.9	5.2	5.5	5	5	5.5	5.4	5.1	5.3	5.5	5.7	5.8	5.5	5.3	5.7	5.1	5.4	5.1	4.8	5.6	5.4	5.4	5.4	5.5	5.7	5.6	5.8	5.8	5.5	fL	4.0-6.2
PDW	16.7	17.3	17.1	16.6	16.3	17	16.1	16.5	16.5	15.7	16.2	15.9	16	16.3	15.5	15.6	15.8	16.1	15.9	16.6	16.7	16.7	16.7	16.4	16.4	16.9	15.4	16.2	16	15.4	16.4	16.8	16.2	15.9	16.7	17	16.2	16.6	17.4	16.8		12.0-17.5
PCT	0.133	0.073	0.12	0.086	0.184	0.137	0.186	0.114	0.087	0.223	0.156	0.168	0.197	0.223	0.298	0.286	0.12	0.275	0.131	0.122	0.045	0.075	0.053	0.068	0.073	0.074	0.076	0.16	0.104	0.274	0.103	0.051	0.088	0.153	0.066	0.069	0.057	0.036	0.043	0.059	%	0.100-0.780
