# Supplementary material for: Leucine alleviates cytokine storm syndrome by regulating macrophage polarization via the mTORC1/LXRα signaling pathway
Source: eLife journal article supplement (doi:10.7554/elife.89750), 2023-08-31
Supplement: fig2-data4 [file Routine blood.xlsx]

## Sheet: Sheet3
	WBC	Neu#	Lym#	Mon#	Eos#	Bas#	Neu%	Lym%	Mon%	Eos%	Bas%	RBC	HGB	HCT	MCV	MCH	MCHC	RDW-CV	RDW-SD	PLT	MPV	PDW	PCT
LPS1	6.28	2.57	1.2	0.98	1.5	0.03	40.8	19.2	15.5	23.9	0.6	9.02	161	44	48.8	17.8	365	14.7	32.9	196	5.4	16.7	0.105
LPS2	5.67	2.1	0.57	1.51	1.46	0.03	36.9	10.1	26.6	25.8	0.6	7.81	141	39.8	51	18	354	14.8	33.5	223	5.6	16.5	0.124
LPS3	3.49	2.31	0.62	0.27	0.29	0	66	17.8	7.8	8.3	0.1	9.18	160	41.8	45.5	17.4	383	14.8	30.9	344	5.5	16.2	0.191
LPS4	3.41	1.77	0.99	0.27	0.37	0.01	51.9	29	7.9	10.7	0.5	4.58	78	21.7	47.5	17.1	360	14.2	30.2	196	5.7	16	0.112
LPS5	5.35	2.47	1.73	0.42	0.68	0.05	46.1	32.3	7.8	12.8	1	8.65	152	41.5	48	17.6	367	12.8	27.9	179	6.2	16.9	0.11
LPS6	4.15	2.04	1.39	0.29	0.39	0.04	49	33.4	7.1	9.4	1.1	8.15	144	37.7	46.2	17.7	382	14.9	31.5	278	5.8	16.6	0.163
LPS+Leu1	2.52	1.37	0.31	0.39	0.44	0.01	54.4	12.3	15.8	17.1	0.4	7.48	137	36.8	49.2	18.4	373	16	36	169	6.3	16.5	0.107
LPS+Leu2	4.68	2.69	1.49	0.32	0.17	0.01	57.4	31.8	6.8	3.7	0.3	8.36	151	39.5	47.3	18.1	382	14.2	30.9	148	6.4	17.4	0.095
LPS+Leu3	3.74	1.86	1.15	0.36	0.35	0.02	49.8	30.8	9.4	9.4	0.6	9.23	160	43.4	47	17.4	369	14.4	31.2	241	5.8	16.3	0.14
LPS+Leu4	2.52	1.31	0.88	0.18	0.15	0	51.7	34.6	7.4	6	0.3	9.49	164	45.1	47.5	17.3	364	13.4	29.2	283	5.9	16.2	0.167
LPS+Leu5	3.34	1.58	1.05	0.39	0.31	0.01	47.1	31.5	11.6	9.4	0.4	9.51	165	44.4	46.7	17.4	372	13.8	29.6	338	5.8	16	0.197
LPS+Leu6	2.72	1.02	1.07	0.3	0.32	0.01	37.4	39.1	11.1	12	0.4	9.59	172	44.8	46.7	17.9	383	13.4	28.7	176	5.9	16.7	0.104
LPS+CLL1	4.51	2.4	1.49	0.09	0.46	0.07	53.1	33	2	10.2	1.7	10.7	183	48.7	45.5	17.1	376	16.9	35.7	320	5.8	16.6	0.186
LPS+CLL2	4.9	2.3	1.51	0.27	0.77	0.05	46.8	30.8	5.5	15.8	1.1	7.75	137	35.4	45.8	17.7	387	15.9	33.2	141	5.9	16.5	0.083
LPS+CLL3	5.4	2.9	1.93	0.21	0.34	0.02	53.7	35.8	4	6.2	0.3	9.34	164	44.2	47.3	17.5	370	15.4	33.6	140	6	17	0.083
LPS+CLL4	4.51	2.84	1.15	0.26	0.25	0.01	62.9	25.4	5.7	5.7	0.3	9.51	168	45.1	47.4	17.7	373	15.8	34.7	216	6	16.2	0.13
LPS+CLL5	4.41	2.42	1.33	0.26	0.39	0.01	54.8	30.1	5.9	8.8	0.4	9.27	166	44.2	47.7	18	377	14.3	31.3	170	6.5	17.3	0.11
LPS+CLL6	3.43	2.18	0.74	0.27	0.24	0	63.5	21.4	7.7	7.2	0.2	8.41	148	40.6	48.2	17.6	365	14.4	32	261	6.5	17.3	0.17
LPS+CLL+Leu1	5.9	3.44	1.39	0.53	0.51	0.03	58.3	23.5	9	8.7	0.5	9.19	160	43.6	47.4	17.4	367	15.4	33.8	189	6.6	16.8	0.124
LPS+CLL+Leu2	5.12	2.93	1.51	0.35	0.31	0.02	57.3	29.5	6.7	6	0.5	9.94	174	46.5	46.8	17.5	374	14.9	32.1	163	5.7	16.2	0.093
LPS+CLL+Leu3	4.64	1.91	1.44	0.83	0.45	0.01	41.1	31.1	17.7	9.9	0.2	8.38	151	39.9	47.6	18	379	13.5	28.5	310	5.6	16.3	0.173
LPS+CLL+Leu4	4.31	2.25	1.62	0.29	0.14	0.01	52.1	37.4	6.8	3.4	0.3	8.52	150	39.9	46.9	17.6	376	13.8	29.6	203	6.2	16.9	0.125
LPS+CLL+Leu5	4.67	2.72	0.92	0.41	0.6	0.02	58.3	19.6	8.9	12.8	0.4	8.14	154	38.3	47	18.9	401	14.9	31.2	142	5.5	16.6	0.078
LPS+CLL+Leu6	3.09	2	0.55	0.23	0.29	0.02	64.6	17.8	7.5	9.3	0.8	8.25	146	38.4	46.6	17.7	380	15.9	33	183	5.8	16	0.105
