# Supplementary material for: Leucine alleviates cytokine storm syndrome by regulating macrophage polarization via the mTORC1/LXRα signaling pathway
Source: eLife journal article supplement (doi:10.7554/elife.89750), 2023-08-31
Supplement: fig2-data5 [file Serum and peritoneal fluid ELISA.xlsx]

## Sheet: IL-6
Serum					Peritoneal fluid
	OD value	Concentration after 7-fold dilution	Concentration			OD value	Concentration after 7-fold dilution	Concentration
LPS1	3.5625	373.825	2616.77		LPS1	2.5247	264.812	1853.68
LPS2	2.7957	293.278	2052.95		LPS2	0.3985	41.4716	290.301
LPS3	0.475	49.5074	346.551		LPS3	0.1489	15.2532	106.772
LPS4	1.7311	181.451	1270.15		LPS4	0.8302	86.8183	607.728
LPS5	3.4479	361.787	2532.51		LPS+leu1	0.1247	12.7111	88.9779
LPS6	3.5025	367.522	2572.65		LPS+leu2	0.347	36.062	252.434
LPS+leu1	0.6913	72.2279	505.596		LPS+leu3	0.2286	23.625	165.375
LPS+leu2	0.8776	91.7973	642.581		LPS+leu4	0.126	12.8477	89.9338
LPS+leu3	0.5245	54.7069	382.949		LPS+CLL-1	0.6057	63.2363	442.654
LPS+leu4	0.1734	17.8267	124.787		LPS+CLL-2	1.9467	204.098	1428.68
LPS+leu5	1.7601	184.497	1291.48		LPS+CLL-3	0.3357	34.875	244.125
LPS+leu6	1.0744	112.47	787.287		LPS+CLL-4	1.2691	132.921	930.449
LPS+CLL-1	3.4418	361.146	2528.02		LPS+CLL+Leu-1	0.1569	16.0935	112.654
LPS+CLL-2	3.5371	371.157	2598.1		LPS+CLL+Leu-2	0.2278	23.541	164.787
LPS+CLL-3	1.4227	149.056	1043.39		LPS+CLL+Leu-3	0.1564	16.041	112.287
LPS+CLL-4	0.8005	83.6985	585.89		LPS+CLL+Leu-4	0.3626	37.7006	263.904
LPS+CLL-5	3.2387	339.812	2378.68
LPS+CLL-6	0.7486	78.2468	547.728
LPS+CLL+Leu-1	2.3764	249.234	1744.64
LPS+CLL+Leu-2	2.4426	256.188	1793.32
LPS+CLL+Leu-3	3.3544	351.965	2463.76
LPS+CLL+Leu-4	2.7284	286.209	2003.46
LPS+CLL+Leu-5	0.7612	79.5704	556.993
LPS+CLL+Leu-6	0.9118	95.3897	667.728

## Sheet: TNF-a
Serum					Peritoneal fluid
	OD value	Concentration after 7-fold dilution	Concentration			OD value	Concentration after 7-fold dilution	Concentration
LPS1	0.0913	53.6883	375.818		LPS1	0.0767	44.2078	309.455
LPS2	0.0906	53.2338	372.636		LPS2	0.0631	35.3766	247.636
LPS3	0.0923	54.3377	380.364		LPS3	0.0679	38.4935	269.455
LPS4	0.0756	43.4935	304.455		LPS4	0.0722	41.2857	289
LPS5	0.1098	65.7013	459.909		LPS5	0.076	43.7532	306.273
LPS6	0.0683	38.7532	271.273		LPS6	0.0794	45.961	321.727
LPS+leu1	0.0496	26.6104	186.273		LPS+leu1	0.0532	28.9481	202.636
LPS+leu2	0.076	43.7532	306.273		LPS+leu2	0.0713	40.7013	284.909
LPS+leu3	0.0543	29.6623	207.636		LPS+leu3	0.0629	35.2468	246.727
LPS+leu4	0.0503	27.0649	189.455		LPS+leu4	0.068	38.5584	269.909
LPS+leu5	0.0703	40.0519	280.364		LPS+leu5	0.0593	32.9091	230.364
LPS+leu6	0.0506	27.2597	190.818		LPS+leu6	0.0598	33.2338	232.636
LPS+CLL-1	0.0863	50.4416	353.091		LPS+CLL-1	0.0965	57.0649	399.455
LPS+CLL-2	0.0893	52.3896	366.727		LPS+CLL-2	0.0829	48.2338	337.636
LPS+CLL-3	0.0512	27.6494	193.545		LPS+CLL-3	0.063	35.3117	247.182
LPS+CLL-4	0.0498	26.7403	187.182		LPS+CLL-4	0.0596	33.1039	231.727
LPS+CLL-5	0.0706	40.2468	281.727		LPS+CLL-5	0.0986	58.4286	409
LPS+CLL-6	0.0497	26.6753	186.727		LPS+CLL-6	0.0616	34.4026	240.818
LPS+CLL+Leu-1	0.0579	32	224		LPS+CLL+Leu-1	0.0691	39.2727	274.909
LPS+CLL+Leu-2	0.0576	31.8052	222.636		LPS+CLL+Leu-2	0.0633	35.5065	248.545
LPS+CLL+Leu-3	0.0964	57	399		LPS+CLL+Leu-3	0.0792	45.8312	320.818
LPS+CLL+Leu-4	0.0605	33.6883	235.818		LPS+CLL+Leu-4	0.0754	43.3636	303.545
LPS+CLL+Leu-5	0.0519	28.1039	196.727		LPS+CLL+Leu-5	0.0615	34.3377	240.364
LPS+CLL+Leu-6	0.052	28.1688	197.182		LPS+CLL+Leu-6	0.0647	36.4156	254.909

## Sheet: IFN-y
Serum					Peritoneal fluid
	OD value	Concentration after 7-fold dilution	Concentration			OD value	Concentration after 7-fold dilution	Concentration
LPS1	0.2962	62.0533	434.373		LPS1	0.1106	20.8089	145.662
LPS2	0.0724	12.32	86.24		LPS2	0.1188	22.6311	158.418
LPS3	0.0497	7.27556	50.9289		LPS3	0.1118	21.0756	147.529
LPS4	0.1075	20.12	140.84		LPS4	0.1824	36.7644	257.351
LPS5	0.1927	39.0533	273.373		LPS5	0.1656	33.0311	231.218
LPS6	0.2375	49.0089	343.062		LPS6	0.1156	21.92	153.44
LPS+leu1	0.059	9.34222	65.3956		LPS+leu1	0.1096	20.5867	144.107
LPS+leu2	0.0785	13.6756	95.7289		LPS+leu2	0.1224	23.4311	164.018
LPS+leu3	0.0729	12.4311	87.0178		LPS+leu3	0.1453	28.52	199.64
LPS+leu4	0.0534	8.09778	56.6844		LPS+leu4	0.1857	37.4978	262.484
LPS+leu5	0.0636	10.3644	72.5511		LPS+leu5	0.157	31.12	217.84
LPS+leu6	0.1337	25.9422	181.596		LPS+leu6	0.1409	27.5422	192.796
LPS+CLL-1	0.0936	17.0311	119.218		LPS+CLL-1	0.1182	22.4978	157.484
LPS+CLL-2	0.1527	30.1644	211.151		LPS+CLL-2	0.2064	42.0978	294.684
LPS+CLL-3	0.0627	10.1644	71.1511		LPS+CLL-3	0.1238	23.7422	166.196
LPS+CLL-4	0.0563	8.74222	61.1956		LPS+CLL-4	0.1136	21.4756	150.329
LPS+CLL-5	0.097	17.7867	124.507		LPS+CLL-5	0.1595	31.6756	221.729
LPS+CLL-6	0.0567	8.83111	61.8178		LPS+CLL-6	0.1166	22.1422	154.996
LPS+CLL+Leu-1	0.0562	8.72	61.04		LPS+CLL+Leu-1	0.1155	21.8978	153.284
LPS+CLL+Leu-2	0.0622	10.0533	70.3733		LPS+CLL+Leu-2	0.1165	22.12	154.84
LPS+CLL+Leu-3	0.1894	38.32	268.24		LPS+CLL+Leu-3	0.176	35.3422	247.396
LPS+CLL+Leu-4	0.0986	18.1422	126.996		LPS+CLL+Leu-4	0.1352	26.2756	183.929
LPS+CLL+Leu-5	0.0539	8.20889	57.4622		LPS+CLL+Leu-5	0.1144	21.6533	151.573
LPS+CLL+Leu-6	0.0568	8.85333	61.9733		LPS+CLL+Leu-6	0.1123	21.1867	148.307
