# Supplementary material for: Leucine alleviates cytokine storm syndrome by regulating macrophage polarization via the mTORC1/LXRα signaling pathway
Source: eLife journal article supplement (doi:10.7554/elife.89750), 2023-08-31
Supplement: fig3-data2 [file LPS(100ng mL) 2mM 10mM Leucine.xls]

## Sheet: Result
	cyclophilin	TNF-α	IL-6	IL-1β	NLRP3			TNF-α	IL-6	IL-1β	NLRP3
CON1	16.4151	23.9515	28.0726	26.1122	21.4542		CON1	7.53641	11.6575	9.69711	5.03911
CON2	16.5403	24.0033	28.4009	25.9842	21.3712		CON2	7.46301	11.8606	9.44387	4.83087
CON3	16.4853	23.9735	28.1848	25.8985	21.4439		CON3	7.48829	11.6996	9.41323	4.95865
CON4	16.5103	23.7861	28.5361	25.8536	21.2324		CON4	7.27585	12.0258	9.34326	4.72212
CON5	16.9304	24.2606	28.7048	26.5016	21.9081		CON5	7.33022	11.7744	9.57117	4.97773
CON6	16.517	23.7603	28.1093	25.9977	21.1141		CON6	7.24329	11.5923	9.48063	4.59707
LPS1	17.0954	23.9223	17.4043	18.3504	19.1618		LPS1	6.82694	0.308916	1.25504	2.06643
LPS2	16.5147	23.3447	17.1384	17.9872	18.6989		LPS2	6.82991	0.623614	1.47246	2.18413
LPS3	16.5113	23.5459	17.1446	18.0978	18.7846		LPS3	7.03457	0.633248	1.58651	2.27332
LPS4	16.6553	23.6377	17.494	18.2183	19.0961		LPS4	6.98238	0.838627	1.56296	2.44077
LPS5	16.6433	23.5499	17.1621	17.9491	18.8228		LPS5	6.90652	0.518783	1.30581	2.1795
LPS6	17.7602	24.2806	17.8298	18.5844	19.3877		LPS6	6.52039	0.0695915	0.824195	1.62752
LPS+2mM Leucine-1	17.3011	24.1725	17.9496	18.8817	19.5004		LPS+2mM Leucine-1	6.87145	0.648504	1.5806	2.19928
LPS+2mM Leucine-2	16.837	24.0204	17.6335	18.8327	19.3856		LPS+2mM Leucine-2	7.18344	0.796492	1.9957	2.54859
LPS+2mM Leucine-3	16.886	23.9315	17.7979	18.8879	19.134		LPS+2mM Leucine-3	7.04559	0.911901	2.00191	2.24804
LPS+2mM Leucine-4	16.9073	23.9895	17.561	18.6113	19.232		LPS+2mM Leucine-4	7.08217	0.653649	1.70398	2.3247
LPS+2mM Leucine-5	18.2803	24.966	18.3575	19.4003	19.9678		LPS+2mM Leucine-5	6.68566	0.0771666	1.12001	1.68744
LPS+2mM Leucine-6	18.1778	24.8938	18.3015	19.4363	20.0196		LPS+2mM Leucine-6	6.716	0.123716	1.2585	1.84183
LPS+10mM Leucine-1	16.8074	23.7997	17.3604	18.5876	19.8294		LPS+10mM Leucine-1	6.99231	0.55299	1.78016	3.02198
LPS+10mM Leucine-2	16.9568	23.8248	17.5254	18.996	19.1828		LPS+10mM Leucine-2	6.86804	0.568651	2.03924	2.22602
LPS+10mM Leucine-3	17.0814	24.0367	17.5452	18.824	19.0755		LPS+10mM Leucine-3	6.95524	0.463787	1.7426	1.99403
LPS+10mM Leucine-4	17.0628	23.8463	17.4425	18.6444	19.0864		LPS+10mM Leucine-4	6.7835	0.379705	1.58166	2.02362
LPS+10mM Leucine-5	17.3502	24.3288	17.8628	19.179	19.5272		LPS+10mM Leucine-5	6.97865	0.512652	1.82885	2.17704
LPS+10mM Leucine-6	16.789	23.6653	17.2669	18.6218	19.1403		LPS+10mM Leucine-6	6.87628	0.477932	1.83277	2.35131
								7.38951	11.7684	9.49155	4.85426
								TNF-α	IL-6	IL-1β	NLRP3
							CON1	0.146897	-0.110843	0.205565	0.184855
							CON2	0.0735017	0.0922635	-0.0476731	-0.0233857
							CON3	0.098776	-0.0687949	-0.0783127	0.104392
							CON4	-0.113664	0.257443	-0.148289	-0.132139
							CON5	-0.0592936	0.00599321	0.0796215	0.123466
							CON6	-0.146217	-0.176061	-0.0109118	-0.257188
							LPS1	-0.562569	-11.4595	-8.2365	-2.78783
							LPS2	-0.559599	-11.1448	-8.01908	-2.67013
							LPS3	-0.354936	-11.1351	-7.90504	-2.58094
							LPS4	-0.407129	-10.9297	-7.92858	-2.41349
							LPS5	-0.482994	-11.2496	-8.18573	-2.67476
							LPS6	-0.869118	-11.6988	-8.66735	-3.22674
							LPS+2mM Leucine-1	-0.518056	-11.1199	-7.91095	-2.65498
							LPS+2mM Leucine-2	-0.206068	-10.9719	-7.49585	-2.30567
							LPS+2mM Leucine-3	-0.343922	-10.8565	-7.48964	-2.60622
							LPS+2mM Leucine-4	-0.307344	-11.1147	-7.78756	-2.52956
							LPS+2mM Leucine-5	-0.703846	-11.6912	-8.37154	-3.16682
							LPS+2mM Leucine-6	-0.673512	-11.6447	-8.23304	-3.01243
							LPS+10mM Leucine-1	-0.397197	-11.2154	-7.71139	-1.83228
							LPS+10mM Leucine-2	-0.52147	-11.1997	-7.45231	-2.62824
							LPS+10mM Leucine-3	-0.434273	-11.3046	-7.74894	-2.86023
							LPS+10mM Leucine-4	-0.606007	-11.3887	-7.90989	-2.83064
							LPS+10mM Leucine-5	-0.41086	-11.2557	-7.66269	-2.67722
							LPS+10mM Leucine-6	-0.513234	-11.2904	-7.65878	-2.50296
								TNF-α	IL-6	IL-1β	NLRP3
							CON1	0.903191	1.07986	0.867199	0.879738
							CON2	0.950329	0.93805	1.0336	1.01634
							CON3	0.933825	1.04884	1.05578	0.930197
							CON4	1.08197	0.836569	1.10825	1.09592
							CON5	1.04196	0.995854	0.946306	0.91798
							CON6	1.10666	1.1298	1.00759	1.19515
							LPS1	1.4769	2816.05	301.602	6.90592
							LPS2	1.47386	2264.16	259.409	6.36487
							LPS3	1.27893	2249.09	239.692	5.98327
							LPS4	1.32604	1950.66	243.636	5.32761
							LPS5	1.39764	2434.81	291.173	6.38532
							LPS6	1.82655	3324.18	406.567	9.36153
							LPS+2mM Leucine-1	1.43202	2225.43	240.676	6.29839
							LPS+2mM Leucine-2	1.15354	2008.47	180.499	4.94396
							LPS+2mM Leucine-3	1.2692	1854.06	179.724	6.08908
							LPS+2mM Leucine-4	1.23743	2217.51	220.948	5.77394
							LPS+2mM Leucine-5	1.62884	3306.77	331.195	8.98066
							LPS+2mM Leucine-6	1.59495	3201.78	300.88	8.06925
							LPS+10mM Leucine-1	1.31695	2377.75	209.584	3.56099
							LPS+10mM Leucine-2	1.43542	2352.08	175.133	6.18272
							LPS+10mM Leucine-3	1.35123	2529.41	215.112	7.26129
							LPS+10mM Leucine-4	1.52204	2681.21	240.499	7.11388
							LPS+10mM Leucine-5	1.32948	2445.17	202.628	6.39621
							LPS+10mM Leucine-6	1.42725	2504.73	202.079	5.66845
