# Supplementary material for: Leucine alleviates cytokine storm syndrome by regulating macrophage polarization via the mTORC1/LXRα signaling pathway
Source: eLife journal article supplement (doi:10.7554/elife.89750), 2023-08-31
Supplement: fig3-data5 [file IL-4(20nM) 2mM 10mM leucine.xlsx]

## Sheet: Sheet1
CT
	Cyclophilin	Mgl-1	Mgl-2	Arg-1	Fizz-1	Ym1
con1	22.4336	30.024	32.898	36.6548	37.5094	32.5106
con2	22.3021	30.2399	33.4833	33.83	36.719	33.2262
con3	22.932	30.3798	32.4689			34.9721
con4	23.0363	29.8275	35.0902	35.8996	36.9629	31.9058
IL4-20-1	22.7413	28.1175	28.5389	26.8329	26.9334	26.3792
IL4-20-2	22.9142	28.8026	28.8732	27.482	25.727	26.7066
IL4-20-3	22.4518	27.836	27.807	25.7441	23.3827	25.2009
IL4-20-4	22.289	27.9933	28.0581	26.5527	24.2308	25.7594
L2-1	23.646	29.5369	29.5882	27.3291	25.1792	26.7667
L2-2	22.3921	28.0131	28.2378	25.6582	24.2611	24.9648
L2-3	23.1319	28.8139	29.8195	27.0317	25.1833	25.9684
L2-4	22.6297	27.861	28.2295	25.7279	24.2368	24.9712
L2-5	22.8646	28.316	27.9924	25.6462	24.3729	25.1302
L2-6	22.1532	27.4461	28.0118	25.5065	23.3684	24.7241
L10-1	22.4852	28.1014	28.3004	25.8241	24.9691	25.6771
L10-2	22.5685	28.1569	28.4418	26.1916	24.7284	25.9578
L10-3	23.1807	28.2049	28.8152	26.1015	24.8293	26.0244
L10-4	22.4108	27.1801	27.7087	25.1864	23.0475	24.9815
L10-5	22.6117	27.9116	28.0259	25.5564	23.195	25.0805
L10-6	21.3455	26.504	26.5499	24.4083	22.3358	23.8824
△CT	Mgl-1	Mgl-2	Arg-1	Fizz-1	Ym1
con1	7.59045	10.4644	14.2212	15.0758	10.077
con2	7.93776	11.1812	11.5279	14.4169	10.9241
con3	7.44784	9.53694			12.0401
con4	6.79117	12.0539	12.8633	13.9266	8.86953
IL4-20-1	5.37619	5.79758	4.09157	4.19209	3.63792
IL4-20-2	5.88841	5.95899	4.56779	2.81278	3.79236
IL4-20-3	5.38424	5.35527	3.29233	0.930949	2.74916
IL4-20-4	5.70427	5.76903	4.26372	1.94173	3.47038
L2-1	5.89091	5.94222	3.68308	1.53327	3.12074
L2-2	5.62102	5.84572	3.26614	1.86902	2.57277
L2-3	5.68202	6.68763	3.89976	2.0514	2.83648
L2-4	5.23128	5.59986	3.09817	1.60714	2.34154
L2-5	5.45137	5.12784	2.78162	1.50836	2.26566
L2-6	5.29288	5.85852	3.35322	1.21512	2.57086
L10-1	5.61618	5.81523	3.33891	2.48395	3.19194
L10-2	5.5883	5.87323	3.62302	2.15981	3.38924
L10-3	5.02423	5.63446	2.92077	1.64857	2.84364
L10-4	4.76936	5.29793	2.77564	0.636721	2.57074
L10-5	5.29994	5.41417	2.94468	0.583337	2.46881
L10-6	5.15851	5.20438	3.06284	0.990293	2.53687
	7.4418	10.8091	12.8708	14.4731	10.4777
	Mgl-1	Mgl-2	Arg-1	Fizz-1	Ym1
con1	0.148643	-0.344683	1.35043	0.602739	-0.400664
con2	0.495958	0.372077	-1.34296	-0.056194	0.44644
con3	0.00603485	-1.27217			1.56237
con4	-0.650637	1.24477	-0.00746886	-0.546545	-1.60815
IL4-20-1	-2.06561	-5.01153	-8.77924	-10.281	-6.83977
IL4-20-2	-1.55339	-4.85011	-8.30302	-11.6603	-6.68533
IL4-20-3	-2.05756	-5.45384	-9.57848	-13.5422	-7.72853
IL4-20-4	-1.73753	-5.04008	-8.6071	-12.5314	-7.00731
L2-1	-1.55089	-4.86688	-9.18773	-12.9398	-7.35695
L2-2	-1.82078	-4.96338	-9.60468	-12.6041	-7.90491
L2-3	-1.75978	-4.12147	-8.97106	-12.4217	-7.64121
L2-4	-2.21053	-5.20925	-9.77265	-12.866	-8.13615
L2-5	-1.99043	-5.68126	-10.0892	-12.9647	-8.21203
L2-6	-2.14892	-4.95059	-9.51759	-13.258	-7.90682
L10-1	-1.82562	-4.99387	-9.53191	-11.9892	-7.28574
L10-2	-1.8535	-4.93588	-9.24779	-12.3133	-7.08844
L10-3	-2.41758	-5.17465	-9.95004	-12.8245	-7.63404
L10-4	-2.67244	-5.51118	-10.0952	-13.8364	-7.90694
L10-5	-2.14187	-5.39494	-9.92613	-13.8898	-8.00887
L10-6	-2.28329	-5.60473	-9.80797	-13.4828	-7.94081
	Mgl-1	Mgl-2	Arg-1	Fizz-1	Ym1
con1	0.902098	1.26987	0.392176	0.658503	1.32012
con2	0.70909	0.772669	2.53671	1.03972	0.733852
con3	0.995826	2.41524	1	1	0.338594
con4	1.56986	0.421974	1.00519	1.46058	3.0486
IL4-20-1	4.18611	32.2567	439.355	1244.21	114.545
IL4-20-2	2.93506	28.8423	315.834	3236.74	102.916
IL4-20-3	4.16282	43.8297	764.558	11928.7	212.089
IL4-20-4	3.33465	32.9014	389.937	5919.98	128.65
L2-1	2.92998	29.1795	583.153	7857.4	163.931
L2-2	3.53273	31.198	778.566	6225.98	239.671
L2-3	3.38647	17.4055	501.831	5486.61	199.633
L2-4	4.62844	36.9947	874.701	7465.2	281.335
L2-5	3.97356	51.3133	1089.3	7994.24	296.528
L2-6	4.43497	30.9226	732.961	9796.06	239.989
L10-1	3.5446	31.8643	740.269	4065.32	156.037
L10-2	3.61376	30.6089	607.942	5089.46	136.092
L10-3	5.34273	36.1181	989.149	7253.84	198.644
L10-4	6.37508	45.6069	1093.83	14627.4	240.008
L10-5	4.41333	42.0764	972.887	15178.8	257.578
L10-6	4.86787	48.6622	896.385	11448	245.71
