# Supplementary material for: Leucine alleviates cytokine storm syndrome by regulating macrophage polarization via the mTORC1/LXRα signaling pathway
Source: eLife journal article supplement (doi:10.7554/elife.89750), 2023-08-31
Supplement: fig4-data4 [file IL-4 Torin1.xls]

## Sheet: Result
	Cyclophilin	Arg1	Fizz1	Mgl1	Mgl2
Con1	16.8867	31.6467	31.1709	26.1312	28.2407
Con2	17.1926	32.8416	34.8	26.5186	28.7301
Con3	16.2501	31.9985	34.221	25.8917	27.928
Con4	17.3838	33.5436	35.9282	26.9662	29.1297
Con5	16.9837	33.6876	33.6308	26.5588	28.4064
Leu1	16.9274	32.2578	33.2406	26.5124	28.2619
Leu2	16.2084	32.5564	33.2413	25.9343	27.7482
Leu3	17.3665	33.0276	34.7261	26.7653	28.6287
Leu4	16.286	26.1941	25.8455	26.0386	27.9168
Leu5	16.1296	30.7096	30.3765	25.733	27.7943
IL4-1	16.4561	18.8093	17.6362	23.2881	20.9406
IL4-2	16.808	18.9524	18.0027	23.7878	21.2165
IL4-3	16.4203	18.6653	17.5593	23.1403	20.9219
IL4-4	15.956	18.1017	16.9831	22.6825	20.3455
IL4-5	16.8205	19.0398	17.9252	23.4378	21.1349
IL4+Leu1	16.234	18.3177	17.1787	22.6967	20.4365
IL4+Leu2	16.5952	18.6858	17.6899	22.8787	20.5822
IL4+Leu3	16.3238	18.4106	17.5557	22.6127	20.4511
IL4+Leu4	15.9571	18.0488	17.0847	22.3661	20.1383
IL4+Leu5	16.2772	18.1235	17.2602	22.4534	20.3055
IL4+Troin1-1	18.3041	24.6284	26.4678	30.4931	29.9179
IL4+Troin1-2	17.7543	24.5673	26.0625	29.5218	29.5675
IL4+Troin1-3	18.0572	24.5048	26.2549	29.8547	29.4889
IL4+Troin1-4	18.061	24.4828	26.2519	29.6775	29.6785
IL4+Troin1-5	17.8014	24.6297	25.9675	30.1484	29.8272
IL4+Torin1+Leu1	18.1077	24.359	26.1828	29.6745	29.7558
IL4+Torin1+Leu2	17.4496	23.7374	26.2013	29.9015	29.3084
IL4+Torin1+Leu3	17.7263	23.5701	26.3475	29.7019	29.5544
IL4+Torin1+Leu4	17.6106	24.0244	25.836	29.7405	30.0868
IL4+Torin1+Leu5	17.6263	23.9687	25.7207	29.64	29.5105
CT
	Arg1	Fizz1	Mgl1	Mgl2
Con1	14.76	14.2841	9.24445	11.354
Con2	15.649	17.6074	9.32605	11.5375
Con3	15.7484	17.9709	9.64163	11.6779
Con4	16.1598	18.5444	9.58237	11.746
Con5	16.7038	16.6471	9.5751	11.4227
Leu1	15.3304	16.3132	9.58503	11.3346
Leu2	16.348	17.0329	9.72585	11.5398
Leu3	15.6611	17.3596	9.39879	11.2622
Leu4	9.90812	9.55951	9.75263	11.6308
Leu5	14.58	14.2469	9.60336	11.6647
IL4-1	2.35321	1.18013	6.83197	4.48449
IL4-2	2.1444	1.1947	6.97973	4.4085
IL4-3	2.24497	1.13898	6.71997	4.50156
IL4-4	2.14573	1.0271	6.72648	4.38954
IL4-5	2.21932	1.10467	6.61726	4.31444
IL4+Leu1	2.08364	0.944629	6.46271	4.20251
IL4+Leu2	2.0906	1.09464	6.2835	3.98699
IL4+Leu3	2.08675	1.23187	6.28887	4.1273
IL4+Leu4	2.0917	1.12763	6.40897	4.18122
IL4+Leu5	1.84631	0.982985	6.17617	4.02833
IL4+Troin1-1	6.32431	8.16371	12.189	11.6138
IL4+Troin1-2	6.81296	8.30813	11.7674	11.8131
IL4+Troin1-3	6.44767	8.19778	11.7976	11.4317
IL4+Troin1-4	6.42183	8.1909	11.6166	11.6175
IL4+Troin1-5	6.82838	8.16611	12.347	12.0259
IL4+Torin1+Leu1	6.25132	8.07513	11.5668	11.6481
IL4+Torin1+Leu2	6.28786	8.75178	12.452	11.8588
IL4+Torin1+Leu3	5.84385	8.62129	11.9756	11.8281
IL4+Torin1+Leu4	6.41383	8.2254	12.1299	12.4762
IL4+Torin1+Leu5	6.34244	8.09445	12.0137	11.8842
Average	15.8042	17.0108	9.47392	11.5476
	Arg1	Fizz1	Mgl1	Mgl2
Con1	-1.04425	-2.72666	-0.229467	-0.193612
Con2	-0.155161	0.596631	-0.147874	-0.0101444
Con3	-0.0557978	0.960097	0.167713	0.130336
Con4	0.355582	1.53364	0.10845	0.198357
Con5	0.899624	-0.363709	0.101179	-0.124936
Leu1	-0.473805	-0.697543	0.111111	-0.213
Leu2	0.543776	0.0220737	0.25193	-0.00780315
Leu3	-0.143083	0.348839	-0.0751289	-0.285352
Leu4	-5.89608	-7.45128	0.278709	0.0831936
Leu5	-1.22418	-2.76391	0.129437	0.117053
IL4-1	-13.451	-15.8307	-2.64195	-7.06311
IL4-2	-13.6598	-15.8161	-2.49419	-7.1391
IL4-3	-13.5592	-15.8718	-2.75395	-7.04604
IL4-4	-13.6585	-15.9837	-2.74744	-7.15806
IL4-5	-13.5849	-15.9061	-2.85666	-7.23316
IL4+Leu1	-13.7206	-16.0662	-3.01121	-7.34508
IL4+Leu2	-13.7136	-15.9161	-3.19042	-7.56061
IL4+Leu3	-13.7175	-15.7789	-3.18505	-7.4203
IL4+Leu4	-13.7125	-15.8832	-3.06495	-7.36638
IL4+Leu5	-13.9579	-16.0278	-3.29775	-7.51927
IL4+Troin1-1	-9.47989	-8.84708	2.71511	0.0661657
IL4+Troin1-2	-8.99125	-8.70266	2.29351	0.265529
IL4+Troin1-3	-9.35654	-8.81301	2.32363	-0.115887
IL4+Troin1-4	-9.38237	-8.81989	2.14266	0.0699404
IL4+Troin1-5	-8.97583	-8.84467	2.87308	0.478287
IL4+Torin1+Leu1	-9.55288	-8.93565	2.0929	0.10052
IL4+Torin1+Leu2	-9.51635	-8.259	2.97807	0.311251
IL4+Torin1+Leu3	-9.96035	-8.38949	2.5017	0.280528
IL4+Torin1+Leu4	-9.39037	-8.78539	2.65594	0.928629
IL4+Torin1+Leu5	-9.46176	-8.91633	2.53977	0.336627
	Arg1	Fizz1	Mgl1	Mgl2
Con1	2.06229	6.61919	1.1724	1.14362
Con2	1.11355	0.661296	1.10794	1.00706
Con3	1.03943	0.514022	0.890253	0.913619
Con4	0.781554	0.345406	0.927584	0.871542
Con5	0.536027	1.28673	0.932271	1.09046
Leu1	1.38877	1.62174	0.925875	1.1591
Leu2	0.685973	0.984816	0.839772	1.00542
Leu3	1.10426	0.785216	1.05346	1.21871
Leu4	59.5521	175.008	0.824328	0.943966
Leu5	2.33622	6.79233	0.914188	0.922069
IL4-1	11198.3	58277.8	6.24176	133.723
IL4-2	12942.3	57692.2	5.63412	140.956
IL4-3	12070.8	59963.8	6.7456	132.151
IL4-4	12930.4	64799	6.71524	142.821
IL4-5	12287.4	61407	7.24335	150.452
IL4+Leu1	13499	68611.2	8.0624	162.589
IL4+Leu2	13434	61835.3	9.12875	188.786
IL4+Leu3	13470	56224.6	9.09487	171.29
IL4+Leu4	13423.8	60437.5	8.36838	165.007
IL4+Leu5	15912.8	66811.2	9.83377	183.454
IL4+Troin1-1	714.057	460.507	0.15229	0.955173
IL4+Troin1-2	508.903	416.641	0.203979	0.831893
IL4+Troin1-3	655.54	449.759	0.199764	1.08364
IL4+Troin1-4	667.384	451.909	0.226462	0.952677
IL4+Troin1-5	503.493	459.74	0.136495	0.71783
IL4+Torin1+Leu1	751.111	489.665	0.234409	0.932697
IL4+Torin1+Leu2	732.328	306.343	0.126915	0.805942
IL4+Torin1+Leu3	996.242	335.343	0.176569	0.82329
IL4+Torin1+Leu4	671.095	441.23	0.158666	0.525357
IL4+Torin1+Leu5	705.139	483.152	0.17197	0.791891
