# Supplementary material for: Leucine alleviates cytokine storm syndrome by regulating macrophage polarization via the mTORC1/LXRα signaling pathway
Source: eLife journal article supplement (doi:10.7554/elife.89750), 2023-08-31
Supplement: fig5-data1 [file elife-89750-fig5-data1-v1.zip]

|         | IL-4 | - | - | + | + | + | + |
|---------|------|---|---|---|---|---|---|
| Leucine | -    | + | - | + | - | + | + |
| GSK2033 | -    | - | - | - | + | + | + |

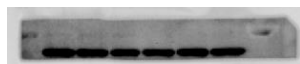

Actin

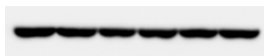

Actin

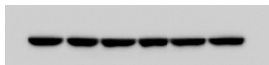

Actin

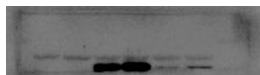

Arg1

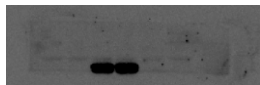

Arg1

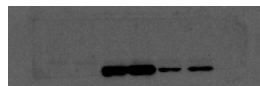

Arg1

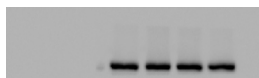

p-STAT6

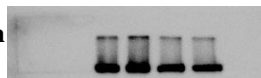

p-STAT6

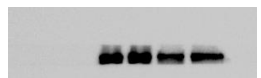

p-STAT6

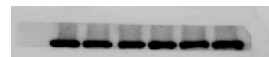

STAT6

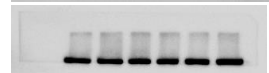

STAT6

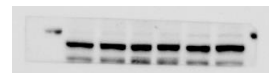

STAT6

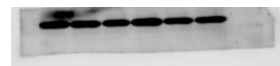

LXRα

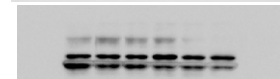

LXRα

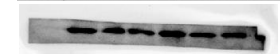

LXRα

Figure 5A

|         | IL-4 | - | - | + | + | + | + |
|---------|------|---|---|---|---|---|---|
| Leucine | -    | + | - | + | - | + | + |
| GSK2033 | -    | - | - | - | + | + | + |

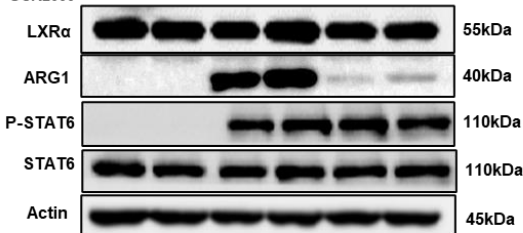

LXRα

55kDa

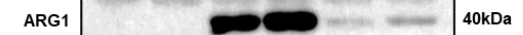

ARG1

40kDa

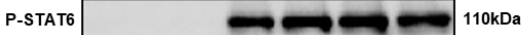

P-STAT6

110kDa

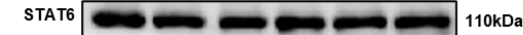

STAT6

110kDa

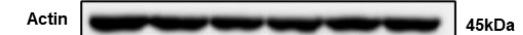

Actin

45kDa

BMDMs
