# Supplementary material for: Leucine alleviates cytokine storm syndrome by regulating macrophage polarization via the mTORC1/LXRα signaling pathway
Source: eLife journal article supplement (doi:10.7554/elife.89750), 2023-08-31
Supplement: fig5-data5 [file IL4 GSK2033.xls]

## Sheet: Result
	cyclophilin	Arg1	Fizz1	Mgl1	Mgl2			Arg1	Fizz1	Mgl1	Mgl2			Arg1	Fizz1	Mgl1	Mgl2			Arg1	Fizz1	Mgl1	Mgl2
Control1	15.5539	30.2501	30.1623	23.6621	25.0889		Control1	14.6962	14.6084	8.10823	9.53502		Control1	-0.627104	0.253971	-0.211758	-0.250803		Control1	1.54446	0.838585	1.1581	1.18987
Control2	14.9516	30.3675	29.5248	23.3056	24.8266		Control2	15.416	14.5733	8.35403	9.87498		Control2	0.0926286	0.2188	0.0340341	0.0891512		Control2	0.937812	0.85928	0.976685	0.940076
Control3	14.9874	30.8123	29.5553	23.4518	24.9555		Control3	15.8249	14.5679	8.46441	9.96811		Control3	0.501578	0.213492	0.144417	0.182285		Control3	0.706334	0.862447	0.904745	0.881306
Control4	15.0756	30.7396	29.4051	23.4234	24.94		Control4	15.664	14.3295	8.34777	9.86442		Control4	0.340674	-0.0249249	0.0277761	0.0785931		Control4	0.789673	1.01743	0.980931	0.946981
Control5	15.1628	30.7191	29.2728	23.5996	24.9729		Control5	15.5563	14.1099	8.43678	9.81006		Control5	0.232961	-0.244519	0.11679	0.0242403		Control5	0.850887	1.1847	0.922237	0.983338
Control6	16.0296	30.8122	29.9673	24.2384	25.692		Control6	14.7826	13.9376	8.20873	9.66236		Control6	-0.540737	-0.41682	-0.111259	-0.123466		Control6	1.45472	1.33498	1.08017	1.08935
IL4-1	15.053	16.6579	13.3856	20.076	17.0265		IL4-1	1.60482	-1.66748	5.0229	1.97346		IL4-1	-13.7185	-16.0219	-3.29709	-7.81236		IL4-1	13479.8	66539.7	9.8293	224.779
IL4-2	15.1672	16.528	13.4132	20.2478	17.2368		IL4-2	1.36072	-1.75407	5.08055	2.06959		IL4-2	-13.9626	-16.1085	-3.23944	-7.71623		IL4-2	15964.9	70655.8	9.44428	210.289
IL4-3	14.8368	16.174	13.007	20.102	16.7868		IL4-3	1.33715	-1.82978	5.2652	1.95		IL4-3	-13.9862	-16.1842	-3.05479	-7.83582		IL4-3	16227.9	74462.7	8.30964	228.464
IL4-4	15.3795	16.5384	13.4135	20.4703	17.2865		IL4-4	1.15881	-1.96604	5.09075	1.90691		IL4-4	-14.1645	-16.3205	-3.22924	-7.87891		IL4-4	18363.1	81838.3	9.37775	235.39
IL4-5	16.0038	17.3036	14.4906	20.9901	17.9072		IL4-5	1.2998	-1.51318	4.98629	1.9034		IL4-5	-14.0235	-15.8676	-3.3337	-7.88243		IL4-5	16653.5	59790.6	10.0819	235.965
IL4-6	14.9127	16.4515	13.0989	19.9327	16.9934		IL4-6	1.53888	-1.81375	5.02006	2.08078		IL4-6	-13.7844	-16.1682	-3.29993	-7.70505		IL4-6	14110.2	73640.1	9.84867	208.666
IL4+Leucine-1	15.4503	16.4217	13.6034	20.2431	17.3572		IL4+Leucine-1	0.971337	-1.84694	4.79276	1.90685		IL4+Leucine-1	-14.352	-16.2014	-3.52724	-7.87898		IL4+Leucine-1	20911.3	75354	11.5293	235.401
IL4+Leucine-2	15.4449	16.3971	13.5629	20.2252	17.441		IL4+Leucine-2	0.952179	-1.88203	4.78029	1.99609		IL4+Leucine-2	-14.3712	-16.2365	-3.5397	-7.78973		IL4+Leucine-2	21190.9	77208.8	11.6294	221.281
IL4+Leucine-3	15.5101	16.4577	13.6565	20.2903	17.4585		IL4+Leucine-3	0.947617	-1.8535	4.78024	1.94841		IL4+Leucine-3	-14.3757	-16.208	-3.53975	-7.83742		IL4+Leucine-3	21258	75697.2	11.6297	228.717
IL4+Leucine-4	15.576	16.5315	13.6025	20.2556	17.4189		IL4+Leucine-4	0.955495	-1.9735	4.67955	1.84292		IL4+Leucine-4	-14.3678	-16.3279	-3.64044	-7.94291		IL4+Leucine-4	21142.2	82262.5	12.4704	246.067
IL4+Leucine-5	15.9864	16.9216	14.0696	20.7072	17.982		IL4+Leucine-5	0.935157	-1.91681	4.72074	1.9956		IL4+Leucine-5	-14.3882	-16.2713	-3.59925	-7.79022		IL4+Leucine-5	21442.4	79092.7	12.1194	221.356
IL4+Leucine-6	16.4794	17.1575	14.6794	20.8329	17.9954		IL4+Leucine-6	0.678056	-1.8	4.35349	1.51591		IL4+Leucine-6	-14.6453	-16.1545	-3.9665	-8.26991		IL4+Leucine-6	25625.2	72941.6	15.6327	308.668
IL4+GSK2033-1	15.2478	18.1123	17.1411	21.5844	18.3495		IL4+GSK2033-1	2.86448	1.89325	6.33657	3.10166		IL4+GSK2033-1	-12.4589	-12.4612	-1.98342	-6.68416		IL4+GSK2033-1	5629.75	5638.93	3.95428	102.833
IL4+GSK2033-2	15.2832	18.1079	17.149	21.4857	18.4873		IL4+GSK2033-2	2.82466	1.8658	6.20246	3.20411		IL4+GSK2033-2	-12.4987	-12.4887	-2.11753	-6.58171		IL4+GSK2033-2	5787.28	5747.24	4.3395	95.7838
IL4+GSK2033-3	15.325	18.3471	16.9058	21.2414	18.7578		IL4+GSK2033-3	3.02214	1.58078	5.91641	3.43281		IL4+GSK2033-3	-12.3012	-12.7737	-2.40359	-6.35301		IL4+GSK2033-3	5046.94	7002.56	5.29117	81.7425
IL4+GSK2033-4	15.2757	18.254	17.1097	21.5268	18.4072		IL4+GSK2033-4	2.97822	1.83399	6.2511	3.1315		IL4+GSK2033-4	-12.3451	-12.5205	-2.0689	-6.65433		IL4+GSK2033-4	5202.96	5875.37	4.19565	100.728
IL4+GSK2033-5	15.5514	18.4613	17.6229	21.5571	18.7404		IL4+GSK2033-5	2.90991	2.07142	6.00572	3.18896		IL4+GSK2033-5	-12.4134	-12.283	-2.31427	-6.59686		IL4+GSK2033-5	5455.24	4983.79	4.97353	96.7952
IL4+GSK2033-6	15.1096	18.0914	17.1878	21.481	18.274		IL4+GSK2033-6	2.98176	2.07817	6.37131	3.16435		IL4+GSK2033-6	-12.3416	-12.2763	-1.94868	-6.62148		IL4+GSK2033-6	5190.19	4960.55	3.86021	98.4607
IL4+GSK2033+Leucine-1	15.3638	17.767	16.6608	21.229	18.2515		IL4+GSK2033+Leucine-1	2.40313	1.29698	5.86511	2.88765		IL4+GSK2033+Leucine-1	-12.9202	-13.0575	-2.45488	-6.89817		IL4+GSK2033+Leucine-1	7751.21	8524.93	5.48268	119.277
IL4+GSK2033+Leucine-2	15.5899	18.1336	16.9852	21.6085	18.9559		IL4+GSK2033+Leucine-2	2.54369	1.39533	6.01862	3.36603		IL4+GSK2033+Leucine-2	-12.7796	-12.9591	-2.30137	-6.4198		IL4+GSK2033+Leucine-2	7031.62	7963.16	4.92927	85.6153
IL4+GSK2033+Leucine-3	15.5416	18.0546	16.4429	21.4813	18.5085		IL4+GSK2033+Leucine-3	2.51301	0.901235	5.93971	2.96684		IL4+GSK2033+Leucine-3	-12.8103	-13.4532	-2.38028	-6.81899		IL4+GSK2033+Leucine-3	7182.77	11215.6	5.20637	112.907
IL4+GSK2033+Leucine-4	17.8554	19.953	19.5348	23.4271	20.4989		IL4+GSK2033+Leucine-4	2.09755	1.67932	5.57163	2.64343		IL4+GSK2033+Leucine-4	-13.2258	-12.6751	-2.74837	-7.14239		IL4+GSK2033+Leucine-4	9579.84	6540.25	6.71955	141.278
IL4+GSK2033+Leucine-5	15.4809	17.7684	17.1447	22.0898	18.7191		IL4+GSK2033+Leucine-5	2.28756	1.66386	6.60889	3.23824		IL4+GSK2033+Leucine-5	-13.0358	-12.6906	-1.7111	-6.54758		IL4+GSK2033+Leucine-5	8397.65	6610.71	3.2741	93.5445
IL4+GSK2033+Leucine-6	15.526	17.9756	16.9003	21.3225	18.5466		IL4+GSK2033+Leucine-6	2.44958	1.37426	5.79642	3.02053		IL4+GSK2033+Leucine-6	-12.8738	-12.9802	-2.52357	-6.76529		IL4+GSK2033+Leucine-6	7505.64	8080.3	5.75002	108.782
							Average	Arg1	Fizz1	Mgl1	Mgl2
								15.3233	14.3545	8.31999	9.78582
