# Supplementary figures and images for: Leucine alleviates cytokine storm syndrome by regulating macrophage polarization via the mTORC1/LXRα signaling pathway
Source: eLife journal article supplement (doi:10.7554/elife.89750), 2023-08-31

Figure 3F

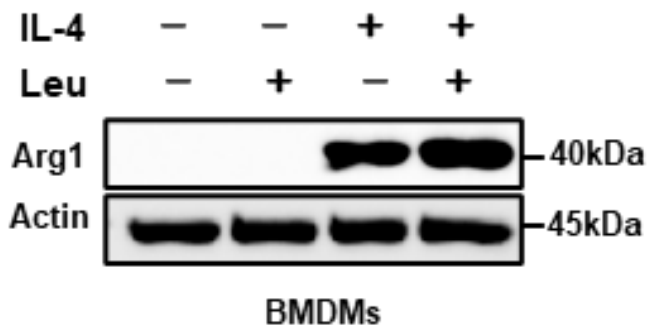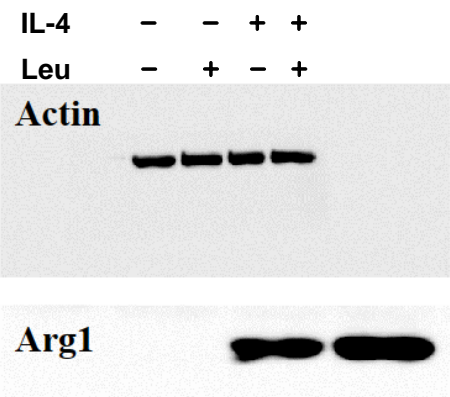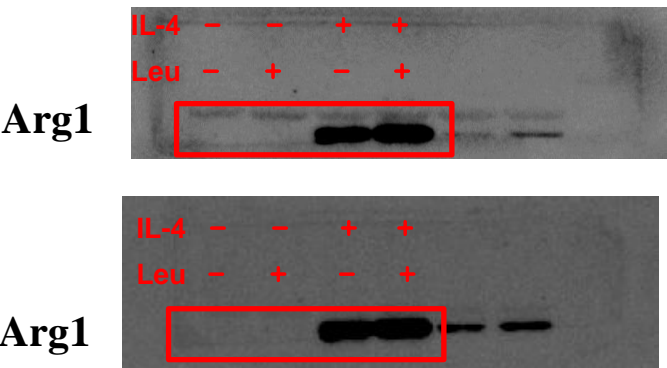

Supplement: fig3-data4 [file elife-89750-fig3-data4-v1.zip]

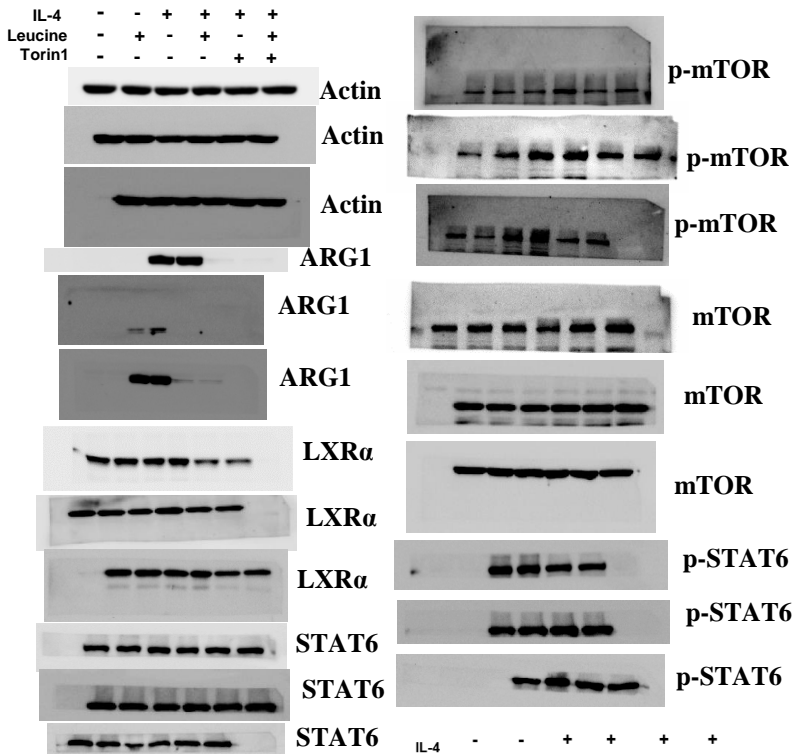

**Figure 4A**

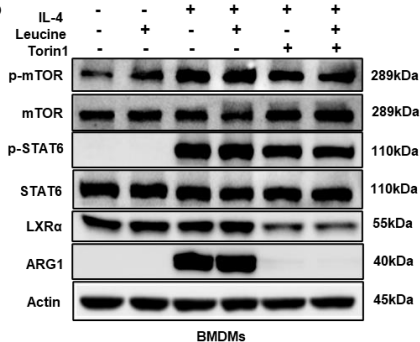

Supplement: fig4-data1 [file elife-89750-fig4-data1-v1.zip]

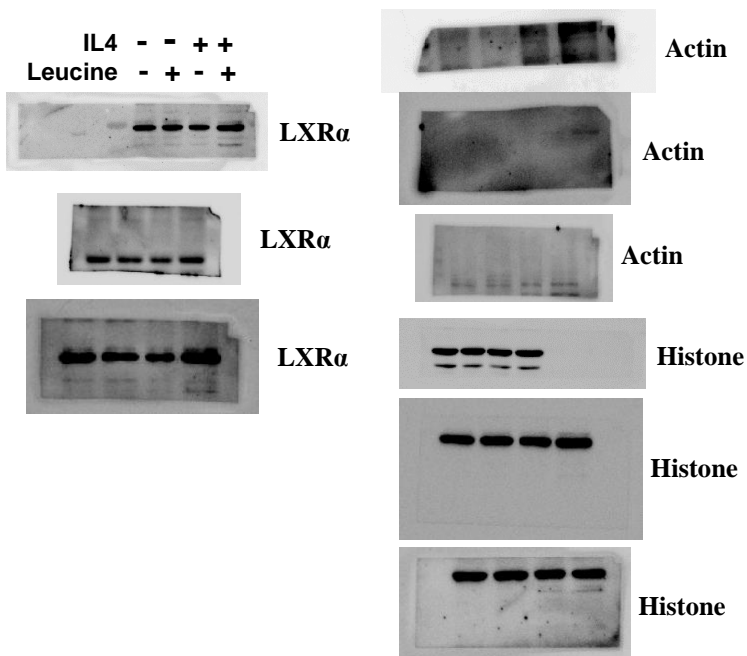

**Figure 5B**

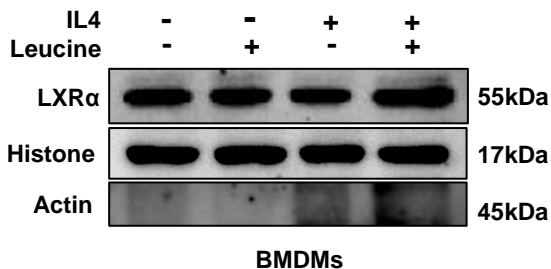

Supplement: fig5-data2 [file elife-89750-fig5-data2-v1.zip]
